# Supplementary material for: Opposing effects of T cell receptor signal strength on CD4 T cells responding to acute versus chronic viral infection
Source: eLife. 2021 Mar 8;10:e61869. doi: 10.7554/eLife.61869 (PMC7943189; doi:10.7554/eLife.61869)
Supplement: Figure 1—source data 1. [file elife-61869-fig1-data1.xlsx]

## Sheet: Sheet1
	1B	% CD69+ SMARTA				1C	in vitro growth kinetics
	Peptide Concentration (M)	GP61	V71S	Y72F
	1e-05	100	78.863	80		Armstrong variants
	3.33e-06	98.6956	82.515	68			FFU/ml
	1.11e-06	98.2213	78.531	50.7			GP61 wt		V71S		Y72F
	3.7e-07	95.2567	62.4846	22.8		Hours post infection	Exp #1	Exp #2	Exp #1	Exp #2	Exp #1	Exp #2
	1.23e-07	91.9364	38.5811	4.69		0	110	31.7	30	20	80	70
	4.12e-08	83.3986	16.4481	1.08		12	221.9	348.7	253.6	348.7	500	1200
	1.37e-08	72.1333	4.58484	0.563		24	102000	40800	102000	183600	81600	112200
	4.57e-09	47.4683	1.2981	0.283		48	42449680	12360960	48980400	11330880	26122880	7210560
	1.52e-09	16.0441	0.56771	0.22
	5.08e-10	5.09902	0.398393	0.168
	1.69e-10	1.48227	0.266702	0.269		Clone-13 variants
	5.65e-11	0	0	0.161			FFU/ml
							GP61 wt		V71S		Y72F
						Hours post infection	Exp #1	Exp #2	Exp #1	Exp #2	Exp #1	Exp #2
						0	70	50	80	40	20	30
						12	190.2	253.6	697.4	95.1	110	126.8
						24	32180	71400	25744	291033	2100	41834
						48	22857520	11330880	9796080	11330880	8240640	10300800
	1D	viral load Armstrong variants in vivo
	viral load in FFU/spleen
	LCMV Arm wt	rLCMV Arm GP61 wt	rLCMV Arm V71S	rLCMV Arm Y72F		Tukey's multiple comparisons test	Mean Diff.	95.00% CI of diff.	Significant?	Summary	Adjusted P Value
	1661423	1247813	639767	550550		LCMV Arm wt vs. rLCMV Arm GP61 wt	331144	-684039 to 1346328	No	ns	0.7877	A-B
	786198	1121670	185828	276833		LCMV Arm wt vs. rLCMV Arm V71S	1131505	116322 to 2146689	Yes	*	0.0264	A-C
	726000	1794672	292389	1004703		LCMV Arm wt vs. rLCMV Arm Y72F	946908	-68275 to 1962091	No	ns	0.0719	A-D
	1184792	1236577	278992	331056		rLCMV Arm GP61 wt vs. rLCMV Arm V71S	800361	-214822 to 1815544	No	ns	0.1506	B-C
	2949980	251939	253888	410709		rLCMV Arm GP61 wt vs. rLCMV Arm Y72F	615764	-399419 to 1630947	No	ns	0.3387	B-D
						rLCMV Arm V71S vs. rLCMV Arm Y72F	-184597	-1199780 to 830586	No	ns	0.953	C-D
	1E	viral load Clone13 variants in vivo
	Viral load spleen (log10 FFU/g)
	Days p.i.	GP61 wt										V71S										Y72F
	4	5.81955	5.66742	5.95882	5.39894	5.43498	6.03641	6.03419	6.43144	6.6019	6.44416	5.52995	5.39606	5.56996	5.67822	5.27246	6.43901	6.41591	6.4257	6.44575	6.05123	6.07111	6.08612	5.77569	5.90887	5.64813	6.40987	6.48564	6.29411	6.41347	5.89138
	7	5.83657	4.99035	5.15415	5.75964	5.65213	5.80295	5.77647	5.62091	5.64953	5.66603	5.30552	4.87837	4.46569	6.59884	5.74165	5.45568	5.47282	5.40403	5.61662	5.70046	5.76253	5.86629	5.90725	5.26403	6.04501	4.98535	6.01148	5.62473	5.05283
	14	2.30103	2.30103	2.30103	2.30103	2.30103	3.79008	4.40651	4.50466	4.48671	4.22426	3.68329	4.89866	4.36115	4.20843	3.94235	4.54484	4.65769	4.13863	3.81244	3.85399	4.25229	3.83855	4.22426	3.09631	3.36587	4.56223	3.76662	3.84578	3.7506	4.77481
	21	2.30103	2.30103	2.30103	2.30103	2.30103	4.90625	4.69535	4.50197	4.31714	4.59901	2.30103	2.30103	2.30103			4.52052	4.29375	3.62152	3.61878	4.03008	2.30103	2.30103	2.30103	2.30103	2.30103	3.79369	4.39921	2.95418	3.7332	3.77117
	Viral load blood (log10 FFU/ml)
	Days p.i.	GP61 wt										V71S										Y72F
	4	4.68245	4.20532	4.80284	4.58099	4.84423	4.78056	4.80404	5.4061	4.84423	4.10387	3.75587	4.10387	3.80284	3.60326	3.30223	3.30223	4.0012	3.77936			4.27996	4.10387	4.10387	3.80284	3.80284	3.90429	4.0012	3.30223	3.77936	4.20532
	7	5.34483	4.84423	4.70017	4.20532	4.41618	5.34483	5.62566	5.08159	4.9055	4.9055	3.30223	3.30223	3.75587	4.10387	4.4049	4.4049	4.4049	4.50181			3.88081	3.64673	4.70017	4.75708	3.77936	5.14854	5.28116	4.88202	4.75708	4.70593
	14	5.26524	4.10387	4.4049	4.10387	4.58099	4.84423	3.80284	4.58099	4.75708	4.4049	4.27996	2.77815	4.4049	2.77815	3.80284	2.77815					4.30223	4.41618	4.4049	4.9055	3.57978	3.80284	3.60326	4.50181	4.27996
	21	4.50181	4.50181	4.10387	4.10387	3.30223	4.80284	4.70593	4.75708	4.91678	5.05811	3.30223	2.77815	3.3019	4.08039	2.77815	3.77936	4.4049	2.77815			2.77815	4.30344	4.78056	4.60447	4.60447	3.60326	4.30344	2.77815	3.30223	2.77815
	Viral load kidney (log10 FFU/g)
	Days p.i.	GP61 wt										V71S										Y72F
	4	5.02469	3.34242	5.04817	5.09932	4.88847	5.38963	4.76144	4.77481	4.77481	4.84859	4.92323	4.02119	4.81208	5.01713	4.52529	4.81756	4.70942	4.62099	5.02469	4.90973	4.51105	4.73524	3.96848	3.87506	3.88649	5.05184	4.89975	3.83885	4.86978	4.30683
	7	6.7869	6.81456	6.73255	6.58261	6.71358	6.36679	6.42383	6.54288	6.7957	6.68467	4.28873	4.56395	4.60971	4.92366	4.05465	4.82971	5.1773	4.74848	4.85232	4.93754	4.73134	6.17565	5.58656	5.47498	5.80404	4.88999	5.14008	4.72366	2.90309
	14	4.93193	4.80284	4.9425	4.76144	2.90309	5.09932	5.30344	5.40035	5.46881	5.28793	5.7945	5.88571	5.44865	5.77601	5.77062	4.66717	4.8126	4.17959	4.73589	4.78493	2.90309	2.90309	5.04951	5.09932	4.64068	5.09932	5.27931	5.09932	4.88847	4.91427
	21	5.08427	5.03862	4.94897	4.46041	4.96669	4.87208	4.65999	4.99169	5.30344	5.41883	4.71176	4.43486	5.21236	5.03805	4.48062	4.86083	4.84176	4.91198			4.34044	4.98518	4.54756	4.70942	4.22305	4.76144	4.61251	4.47378	5.00241	5.03692
	Viral load liver (log10 FFU/ml)
	Days p.i.	GP61 wt										V71S										Y72F
	4	6.12401	5.6286	5.9349	6.21305	6.33568	6.50785	6.38725	6.37535	6.63793	6.3035	5.76058	5.44731	5.81173	5.65559	5.79276	6.04654	5.56905	5.89246	5.88414	4.83335	5.78351	6.1651	6.08177	5.95569	5.98402	5.81484	5.83926	5.61741	5.69642	5.95894
	7	6.31787	6.28572	6.26325	6.40425	6.54768	6.18559	6.13713	6.37281	6.29764	6.62252	6.00361	5.05422	4.41134	6.0666	5.2904	5.95277	5.69826	5.45707	5.05179	5.55132	5.86795	6.17993	6.33298	6.31516	6.28673	5.4904	6.41167	5.81006	5.18848
	14	3	3.1477	3.48687	3.41367	3	3	3	3	3	3.20078	3.59332	3.62675	3	3.61909	3.72547	3	3	3	3	3	3	3.59872	3.90757	3.62099	3	3.10736	3	3.40316	3	3
	21	3	3	3.58799	3	3	3	3	3	3.44111	3	3	3.46041	3			3	3	3	3	3	3.82511	3.50181	3	3.9415	3	3	3	3	3	3
	1F	Outcompetition assay
		MFI GP61-FITC
	GP61-FITC concentration	GP61 wt			V71S			Y72F
	5e-05	1901	1868	1870	1857	1856	1831	1855		1759
	1e-05	2042	1994	1986	2041	2003	1994	2035	2064	2103
	1e-06	2040	2136	2100	2216	2174	2127	2116	2119	2117
	no	2137	2110	2119	2137	2110	2119	2137	2110	2119
