# Supplementary material for: Opposing effects of T cell receptor signal strength on CD4 T cells responding to acute versus chronic viral infection
Source: eLife. 2021 Mar 8;10:e61869. doi: 10.7554/eLife.61869 (PMC7943189; doi:10.7554/eLife.61869)
Supplement: Figure 2—source data 1. [file elife-61869-fig2-data1.xlsx]

## Sheet: Sheet1
	2A
	# SMARTA day 10						# SMARTA day 30+
		GP61 wt	V71S	Y72F				GP61 wt	V71S	Y72F
		591190	9636.34	1761.23				211859	1377.01	512.384
		374816	427.997	603.425				32466.3	950.136	29.3907
		60917.3	26509.6	19.6514				143408	554.527	25.1097
		391909	12447.9	23.2358				63839.1	1071.9	47.4787
		760937	5168.04	29.8277				143649	1406.37	1
		31853.3	16280.3	17.2296				257297	820.408	62.6075
		17500.7	7292.77	225.047				80198	1976.03	1
		92624.8	5618.89					67687.8	4187.18	161.732
			7889.39					82579.1
	# NP309 day 10						# NP309 day 30+
		GP61 wt	V71S	Y72F				GP61 wt	V71S	Y72F
		172765	43580.2	5497.48				1545.12	215.151	1402.83
		13136.7	2265.16	10955.6				1424.23	633.526	365.04
		8193.4	2571.61	8510.47				773.196	524.422	4291.39
		19302.5	805.302	23666.1				223.249	206.204	14854.5
		7535.61	7108.19	60780.9				1456.53	88.633	5954.77
		3186.61	1464.71	3035.32				4327.14	581.671	1304.99
		31815.4	2408.48	4683.05				2732.26	886.1	309.915
		5334.36	13714.9					850.467	2072.08	963.08
			2563.31					451.395
	# CD44+ day 10						# CD44+ day 30+
		GP61 wt	V71S	Y72F				GP61 wt	V71S	Y72F
		4.05062e+06	1.69176e+06	3.97039e+06				683940	426959	588877
		3.40407e+06	2.40709e+06	4178159				567944	495128	1.17605e+06
		5.20046e+06	3.3363e+06	2.32519e+06				638490	677381	1.15335e+06
		4.13777e+06	2.56631e+06	3.83822e+06				674410	819158	824503
		8.45471e+06	5.09186e+06	4.8062e+06				2.38867e+06	854415	1.14939e+06
		3.30971e+06	5.86685e+06	3.40171e+06				1.63144e+06	1.09257e+06	1.24825e+06
		4.4972e+06	4.42635e+06	2.16518e+06				1.50872e+06	1.12151e+06	1.15754e+06
		4.35553e+06	5.20342e+06					266624	973742	1.99717e+06
			3.49803e+06					2.06215e+06
	2B
	relative MFI Ly6C			relative MFI PSGL1			relative MFI FR4
	GP61 wt	V71S		GP61 wt	V71S		GP61 wt	V71S
	1.03281	0.714473		0.890244	0.5		0.854725	1.889
	0.952154	1.02136		0.869001	0.862707		1.24423	1.27176
	0.973154	1.08006		1.2026	0.859166		1.04575	1.05206
	1.04188	0.650519		1.03816	0.675452		0.855299	1.53392
	0.876747	0.61555		0.88746	1.02019		1.41907	1.54216
	0.604443	0.406664		0.990354	0.928617		1.19719	0.850007
	1.63884	0.315299		1.04283	0.528875		0.735201	2.94246
	0.879971	0.550699		1.07936	1.08244		0.648544	1.05313
		0.295593			0.717685			1.69394
	Unpaired t test			Unpaired t test			Unpaired t test
	P value	0.0173		P value	0.0264		P value	0.0407
	P value summary	*		P value summary	*		P value summary	*
	Significantly different (P < 0.05)?	Yes		Significantly different (P < 0.05)?	Yes		Significantly different (P < 0.05)?	Yes
	One- or two-tailed P value?	Two-tailed		One- or two-tailed P value?	Two-tailed		One- or two-tailed P value?	Two-tailed
	2D
	% PSGL1lo Ly6Clo			% PSGL1hi Ly6Chi			Th1/Tfh ratio
	GP61 wt	V71S		GP61 wt	V71S		GP61 wt	V71S
	15.2	14.2		32.8	31.6		2.15789	2.22535
	7	18.3		25.2	24.1		3.6	1.31694
	16.2	34.4		48.2	13.2		2.97531	0.383721
	6.94	14.7		35.9	32.1		5.17291	2.18367
	16.9	24.6		33.9	17.5		2.00592	0.711382
	13.5	38.2		29.9	17.5		2.21481	0.458115
	8.4	27.6		31.1	31		3.70238	1.12319
	10.7	19.6		32.8	32		3.06542	1.63265
		26.4			16.9			0.640152
	Unpaired t test			Unpaired t test			Unpaired t test
	P value	0.0018		P value	0.015		P value	0.0004
	P value summary	**		P value summary	*		P value summary	***
	Significantly different (P < 0.05)?	Yes		Significantly different (P < 0.05)?	Yes		Significantly different (P < 0.05)?	Yes
	One- or two-tailed P value?	Two-tailed		One- or two-tailed P value?	Two-tailed		One- or two-tailed P value?	Two-tailed
	2E
	relative MFI Bcl6			relative MFI Tbet
	GP61 wt	V71S		GP61 wt	V71S
	1.11585	0.963415		1.05749	0.736693
	1.05793	1.31098		0.990774	0.963804
	0.835366	1		0.965224	0.811923
	0.990854	1.19512		0.986515	0.695529
	0.94463	1.16344		1.05613	1.07831
	0.972648	1.09273		0.851005	0.910603
	1.12608	1.50901		1.15454	0.893971
	0.956638	1.02602		0.938323	0.971587
		1.13676			0.851005
	Unpaired t test			Unpaired t test
	P value	0.0387		P value	0.0356
	P value summary	*		P value summary	*
	Significantly different (P < 0.05)?	Yes		Significantly different (P < 0.05)?	Yes
	One- or two-tailed P value?	Two-tailed		One- or two-tailed P value?	Two-tailed
	2F
	Th1			Tfh			Th1			Tfh
	relative MFI Bcl6			relative MFI Bcl6			relative MFI Tbet			relative MFI Tbet
	GP61 wt	V71S		GP61 wt	V71S		GP61 wt	V71S		GP61 wt	V71S
	1.14	0.85		1.83	1.46		1.1	0.96		0.41	0.33
	1.06	1.35		1.77	1.74		0.99	1.12		0.43	0.31
	0.82	0.91		2.94	1.9		0.92	0.9		0.33	0.33
	0.97	1.17		2.04	1.86		0.98	0.97		0.39	0.32
	0.87	1.22		1.64	2.27		1.11	1.14		0.49	0.44
	1	1.12		1.58	1.7		0.94	1.14		0.4	0.4
	1.08	1.43		1.49	2.45		0.93	1.09		0.42	0.51
	1.05	1		1.59	1.79		1.02	1.15		0.44	0.37
		1.07			1.82			1.1			0.41
	Unpaired t test			Unpaired t test			Unpaired t test			Unpaired t test
	P value	0.1188		P value	0.8893		P value	0.1447		P value	0.2414
	P value summary	ns		P value summary	ns		P value summary	ns		P value summary	ns
	Significantly different (P < 0.05)?	No		Significantly different (P < 0.05)?	No		Significantly different (P < 0.05)?	No		Significantly different (P < 0.05)?	No
	One- or two-tailed P value?	Two-tailed		One- or two-tailed P value?	Two-tailed		One- or two-tailed P value?	Two-tailed		One- or two-tailed P value?	Two-tailed
