# Supplementary material for: Opposing effects of T cell receptor signal strength on CD4 T cells responding to acute versus chronic viral infection
Source: eLife. 2021 Mar 8;10:e61869. doi: 10.7554/eLife.61869 (PMC7943189; doi:10.7554/eLife.61869)
Supplement: Figure 3—source data 1. [file elife-61869-fig3-data1.xlsx]

## Sheet: Sheet1
	3A
	# SMARTA day 7
		GP61 wt	V71S	Y72F
		283218	12910.1	713.365
		502497	7237.19	1803.04
		171008	2440.43	732.28
		177138	2768.93	372.282
		406158	1313.91	889.27
		411894	11037.9	385.029
		372069	808.715	210.25
				618.41
	# NP309+ day 7
		GP61 wt	V71S	Y72F
		1385.57	175.685	840.634
		438.9	509.289	2159.89
		1529	4839.24	413.064
		224.584	288.07	341.876
		27.8615	503.766	794.646
		572.345	1969.82	232.251
		716.559	35.4078	479.8
				277.875
	# CD44+ day 7
		GP61 wt	V71S	Y72F
		1.08121e+06	1.71744e+06	1.43392e+06
		1.7096e+06	964323	1.37758e+06
		1.65201e+06	1.21286e+06	1.68539e+06
		1.31452e+06	1.17573e+06	1.61285e+06
		2.07502e+06	915152	1.12621e+06
		2.11358e+06	1.54712e+06	1.33872e+06
		1.94184e+06	348915	1.35212e+06
				978862
	3B
	# SMARTA day 7
		GP61 wt	V71S	Y72F
		283218	12910	713
		502497	7237	1803
		171008	2440	732
		177138	2769	372
		406158	1314	889
		411894	11038	385
		372069	809	210
				618
	# NP309+ day 7
		GP61 wt	V71S	Y72F
		1386	176	841
		439	509	2160
		1529	4839	413
		225	288	342
		28	504	795
		572	1970	232
		717	35	480
				278
	# CD44+ day 7
		GP61 wt	V71S	Y72F
		1081206	1717440	1433921
		1709597	964323	1377578
		1652010	1212861	1685394
		1314516	1175733	1612847
		2075020	915152	1126213
		2113579	1547119	1338719
		1941841	348915	1352120
				978862
	3D
			% PSGL1lo Ly6Clo							% PSGL1hi Ly6Chi							Th1/Tfh ratio
			GP61 wt	V71S	Y72F					GP61 wt	V71S	Y72F					GP61 wt	V71S	Y72F
			32.2	19.7	7.41					13	12.8	19.3					0.4	0.65	2.6
			44	18.7	6.45					7.95	18.7	25.5					0.18	1	3.95
			40.4	17	13.8					8.59	16.1	25.7					0.21	0.95	1.86
			31.7	28.5	9.84					14.3	18.7	24.6					0.45	0.66	2.5
			36.9	16.3	21.2					15.5	29.2	19.4					0.42	1.79	0.92
			32.1	12.1	8.96					17.8	22.6	19.4					0.55	1.87	2.17
			44.6	21.7	19.5					12.1	21	17.1					0.27	0.97	0.88
					20.7							25.2							1.22
			Tukey's multiple comparisons test	Mean Diff.	95.00% CI of diff.	Significant?	Summary	Adjusted P Value		Tukey's multiple comparisons test	Mean Diff.	95.00% CI of diff.	Significant?	Summary	Adjusted P Value		Tukey's multiple comparisons test	Mean Diff.	95.00% CI of diff.	Significant?	Summary	Adjusted P Value
			GP61 wt vs. V71S	18.27	10.53 to 26.01	Yes	****	<0.0001		GP61 wt vs. V71S	-7.123	-12.75 to -1.491	Yes	*	0.0121		GP61 wt vs. V71S	-0.7694	-1.712 to 0.1732	No	ns	0.1222
			GP61 wt vs. Y72F	23.93	16.44 to 31.43	Yes	****	<0.0001		GP61 wt vs. Y72F	-9.276	-14.73 to -3.824	Yes	**	0.001		GP61 wt vs. Y72F	-1.656	-2.568 to -0.7429	Yes	***	0.0005
			V71S vs. Y72F	5.66	-1.833 to 13.15	No	ns	0.1606		V71S vs. Y72F	-2.154	-7.606 to 3.299	No	ns	0.5837		V71S vs. Y72F	-0.8862	-1.799 to 0.02646	No	ns	0.0579
