# Supplementary material for: Opposing effects of T cell receptor signal strength on CD4 T cells responding to acute versus chronic viral infection
Source: eLife. 2021 Mar 8;10:e61869. doi: 10.7554/eLife.61869 (PMC7943189; doi:10.7554/eLife.61869)
Supplement: Figure 4—source data 1. [file elife-61869-fig4-data1.xlsx]

## Sheet: Sheet1
	4A
	relative MFI PD1 total SMARTA					relative MFI PD1 Th1					relative MFI PD1 Tfh
	GP61 wt	V71S	Y72F	r LCMV Arm		GP61 wt	V71S	Y72F	r LCMV Arm		GP61 wt	V71S	Y72F	r LCMV Arm
	3.73	2.05	2.42	0.64		4.24	2.24	2.42	0.63		3.21	1.66	2.47	0.77
	4.17	1.27	1.63	1.06		4.42	1.26	2.08	1.05		3.76	1.09	1.25	1.06
	4.29	3.16	1.45	0.98		5.17	3.4	1.18	1		3.57	2.64	1.9	0.99
	3.97	2.36	0.97	1.33		5.37	2.63	1.16	1.32		3.97	2.36	0.97	1.17
	4.5	1.76	1	0.9		5.21	1.98	1.33	0.91		4.5	1.76	1	0.9
	4.22	1.74	1.14	1.17		4.68	1.99	1.61	1.05		4.22	1.74	1.14	1.17
	4.1	2.26		0.84		4.84	2.39		0.9		4.1	2.26		0.84
		1.99		1.14			2.18		1.12			1.99		1.14
				0.95					1.01					0.95
	4B
	relative MFI Lag3 total SMARTA
	GP61 wt	V71S	Y72F	r LCMV Arm
	2.51	1.77	1.32	1.09
	2.41	1.2	1.1	0.99
	2.91	2.04	1.21	0.98
	3.3	1.42	1.06	0.93
	2.69	1.23	1.02	0.93
	2.62	1.26	1.34	1.05
	2.74	1.5		0.91
		1.39		1.04
				1.07
	4D
	% Inhibitory receptors SMARTA
		PD1+										Lag3+										PD1+Lag3+
	GP61 wt	20.5	31.5	34.9	31.1	32.7	33.7	24.6				0.58	0.33	0.31	0.75	3.36	2.96	2.4				78.3	67.3	64.2	67	61.3	59.2	71.3
	V71S	74.1	72.2	70.7	67.6	68.5	37.8	36.1	37.4			0.43	0.71	0.85	0.5	0.51	11	3.34	6.5			17.4	8.07	8.73	20.7	13.8	31.4	7.8	45.5
	Y72F	41.2	41.1	48.3	51.1	47.1	32.6					1.25	0	3.45	2.17	2.79	6.52					2.5	1.79	6.9	20.7	8.05	10.9
	rLCMV Atm	40.1	56.8	36.1	56.9	42.5	8.51	27.5	23	44		0.64	1.57	0.84	0.93	0.82	6.37	3.53	6.14	1.48		0.8	2.95	1.03	2.27	1.15	1.05	1.7	3.63	1.49
	% Inhibitory receptors CD44+
		PD1+										Lag3+										PD1+Lag3+
	GP61 wt	30.2	29.5	28.4	31	41	37.8	38.7				3.38	4.17	2.55	3.64	6.48	4.38	3.42				51.8	49.4	57.2	52.2	41	43.3	47.6
	V71S	39.2	41.3	43.3	31.7	39.2	40.2	49.7	34.4			1.9	1.52	1.63	1.95	2.42	4.15	1.76	3.86			43	39.1	39.7	54.8	38.2	46.7	37.9	50.2
	Y72F	35.6	35.6	34.8	35.7	38	42.6					3.01	2.98	3.3	5.26	4.97	4.37					39.9	45	43.4	44.8	44.5	41.3
	rLCMV Atm	48.9	45.7	43.1	48.2	44	38.1	38.1	45.1	48.6		2.01	2.43	1.97	2.14	2.57	6.1	3.74	6.35	3.43		9.67	8.49	12.2	14.1	15.5	9.45	6.31	9.36	7.29
	4E
	relative MFI TOX total SMARTA
	GP61 wt	V71S	Y72F	r LCMV Arm
	2.26	1.83	1.46	0.93
	2.18	1.31	1.07	1.03
	2.15	2.34	1.37	0.9
	3.09	1.77	0.74	1.14
	1.85	1.3	0.97	1.16
	2.48	1.23	1.07	1.48
	1.9	1.5		1.01
		1.1		0.94
				0.42
	4F
	relative MFI TCF1 total SMARTA
	GP61 wt	V71S	Y72F	r LCMV Arm
	1.14	0.91	0.88	1.08
	1	1	0.95	1
	1.04	0.89	1.06	0.82
	1.24	0.97	1.07	1.09
	1.01	0.99	1.1	1.13
	0.88	0.84	1.08	1.22
	0.87	0.75		0.85
		0.76		0.99
				0.82
